# Supplementary material for: Raman cell imaging with boron cluster molecules conjugated with biomolecules
Source: Royal Society of Chemistry journal article supplement (doi:10.1039/c9ra04228h), 2019-01-01
Supplement: c9ra04228h1.pdf [file c9ra04228h1.pdf]

## Supporting Information

### **Raman cell imaging with boron cluster molecules conjugated with biomolecules**

Masahito Mochizuki,<sup>1,2</sup> Shinichi Sato,<sup>3</sup> Syifa Asatyas,<sup>1</sup> Zbigniew J. Leśnikowski,<sup>4</sup>  
Tomohiro Hayashi,<sup>1,5,\*</sup> and Hiroyuki Nakamura<sup>3,\*</sup>

- 1) *School of Materials and Chemical Technology, Tokyo Institute of Technology, 4259 Nagatsuta-cho, Midori-ku, Yokohama, 226-8502 (Japan)*
- 2) *Research & Development group, Hitachi, Ltd. 7-1-1 Omika, Hitachi, Ibaraki 319-1292, Japan*
- 3) *Laboratory of Chemical and Life Science Innovative Research. Tokyo Institute of Technology, 4259 Nagatsuta-cho, Midori-ku, Yokohama 226-8502 (Japan)*
- 4) *Institute of Medical Biology, Polish Academy of Sciences, 106 Lodowa St., Lodz 93-232 (Poland)*
- 5) *JST-PRESTO JST-PRESTO, 4-1-8 Hon-cho, Kawaguchi, Saitama 332-0012, (Japan)*

*\*Corresponding Authors:*

[hayashi.t.al@m.titech.ac.jp](mailto:hayashi.t.al@m.titech.ac.jp)

[hiro@res.titech.ac.jp](mailto:hiro@res.titech.ac.jp)

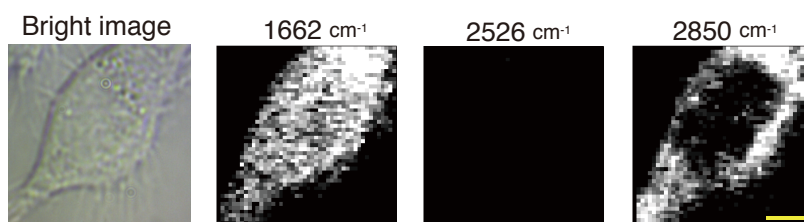

**Figure S1.** Raman imaging of cells exposed to BSH (200 ppm for 2 h); bright image and Raman images at 1662 (protein), 2526 (boron clusters), and 2850 cm<sup>-1</sup> (lipid molecules).

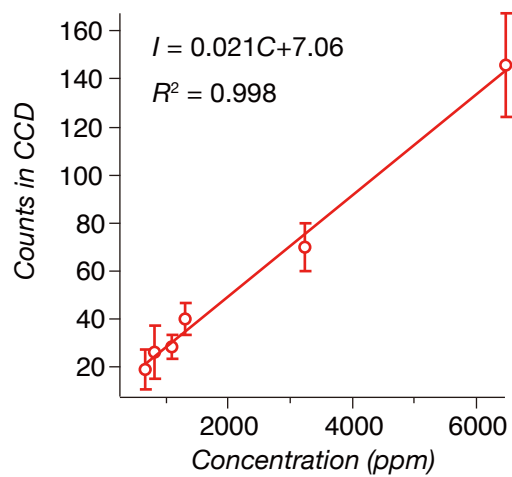

**Figure S2.** Relation between concentration of BSH-Chol in ethanol and counts in CCD.

(a)

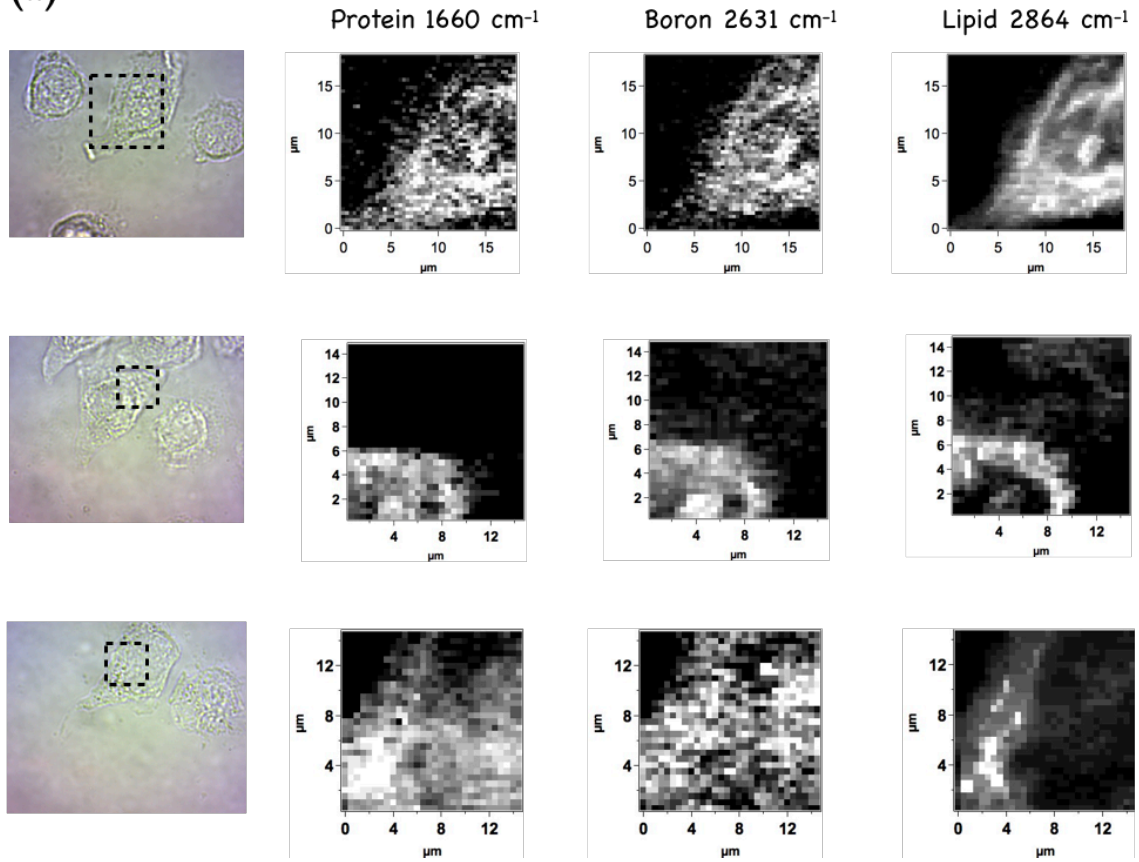

(b)

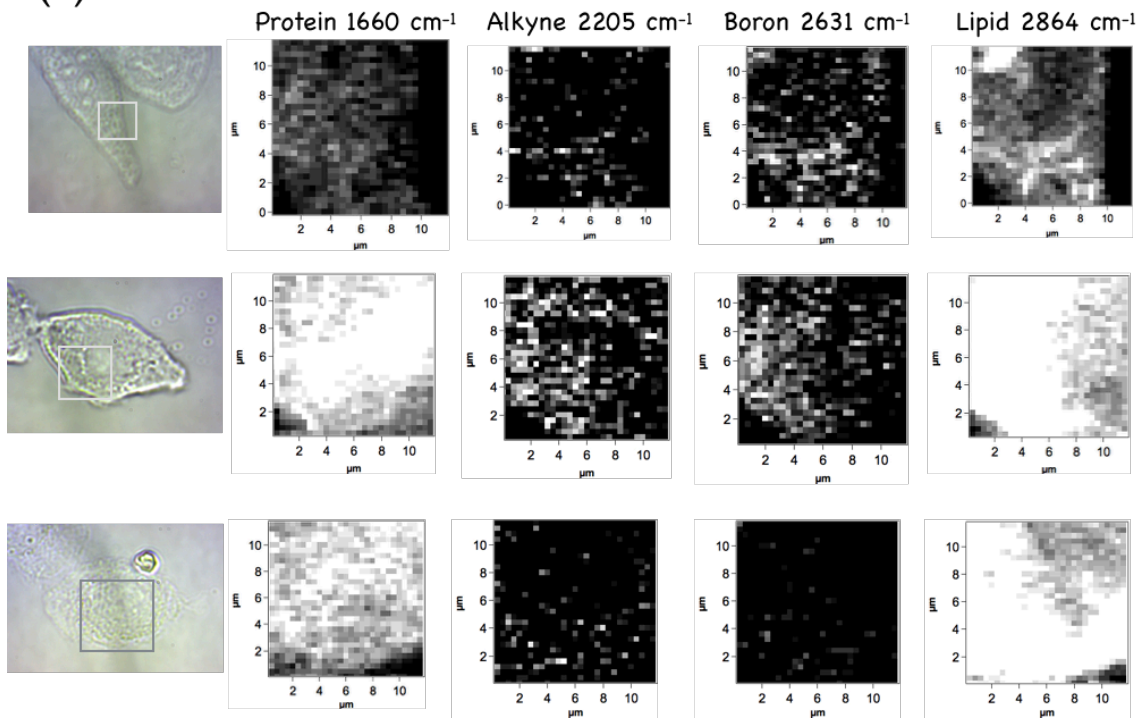

**Figure S3** Results of Raman imaging of cells exposed to (a) BSH-Chol and (b) ZL-1013/MB

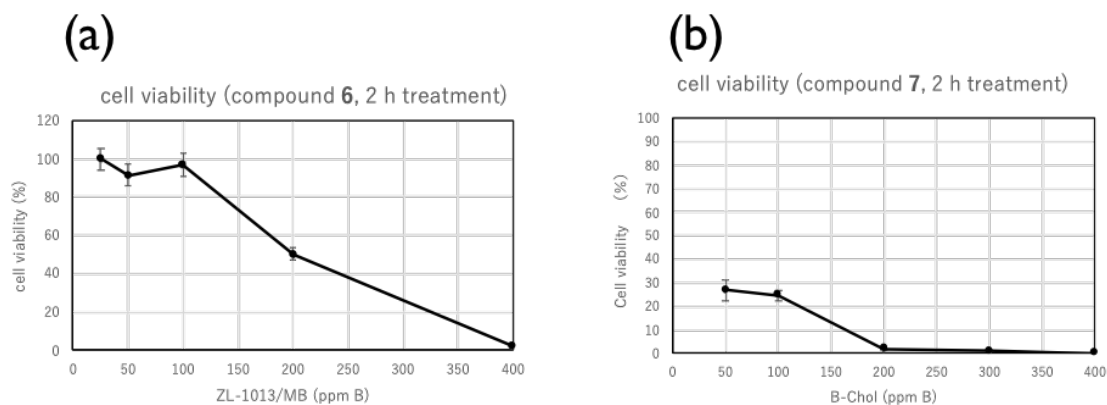

**Figure S4** (a) The results of the MTT assay using (a) Compound 6 (ZL-1013/MB) and (b) BSH-Chol. HeLa cells were seeded at the density of  $1 \times 10^5$  cells / ml x  $100 \mu\text{L}$  were plated on a 96 well plate. After 12 h incubation under 5%  $\text{CO}_2$  at  $37^\circ\text{C}$ , each boron compound sample solution was added (final concentration 50 -200 ppm B), and the cells were incubated (for 10 min-120 min). After removing the boron compound solution, MTT solution in medium (final 0.5 mg/mL,  $100 \mu\text{L}$ ) was added and incubated for 90 min. The cells were rinsed by DMSO, and absorbance was measured (535 nm). The MTT assay revealed that cell viability with the condition of the exposure in the experiments were 50 and 3.3 %, respectively. In the experiment, we also confirmed that some cells lost their native shapes. Therefore, we carefully selected the cells that maintained their native shapes for Raman imaging.
